# Supplementary material for: Genetic evidence that the Makira region in northeastern Madagascar is a hotspot of malaria transmission
Source: Springer Nature journal article supplement (doi:10.1186/s12936-016-1644-4), 2016-12-01

**S Fig. 1**

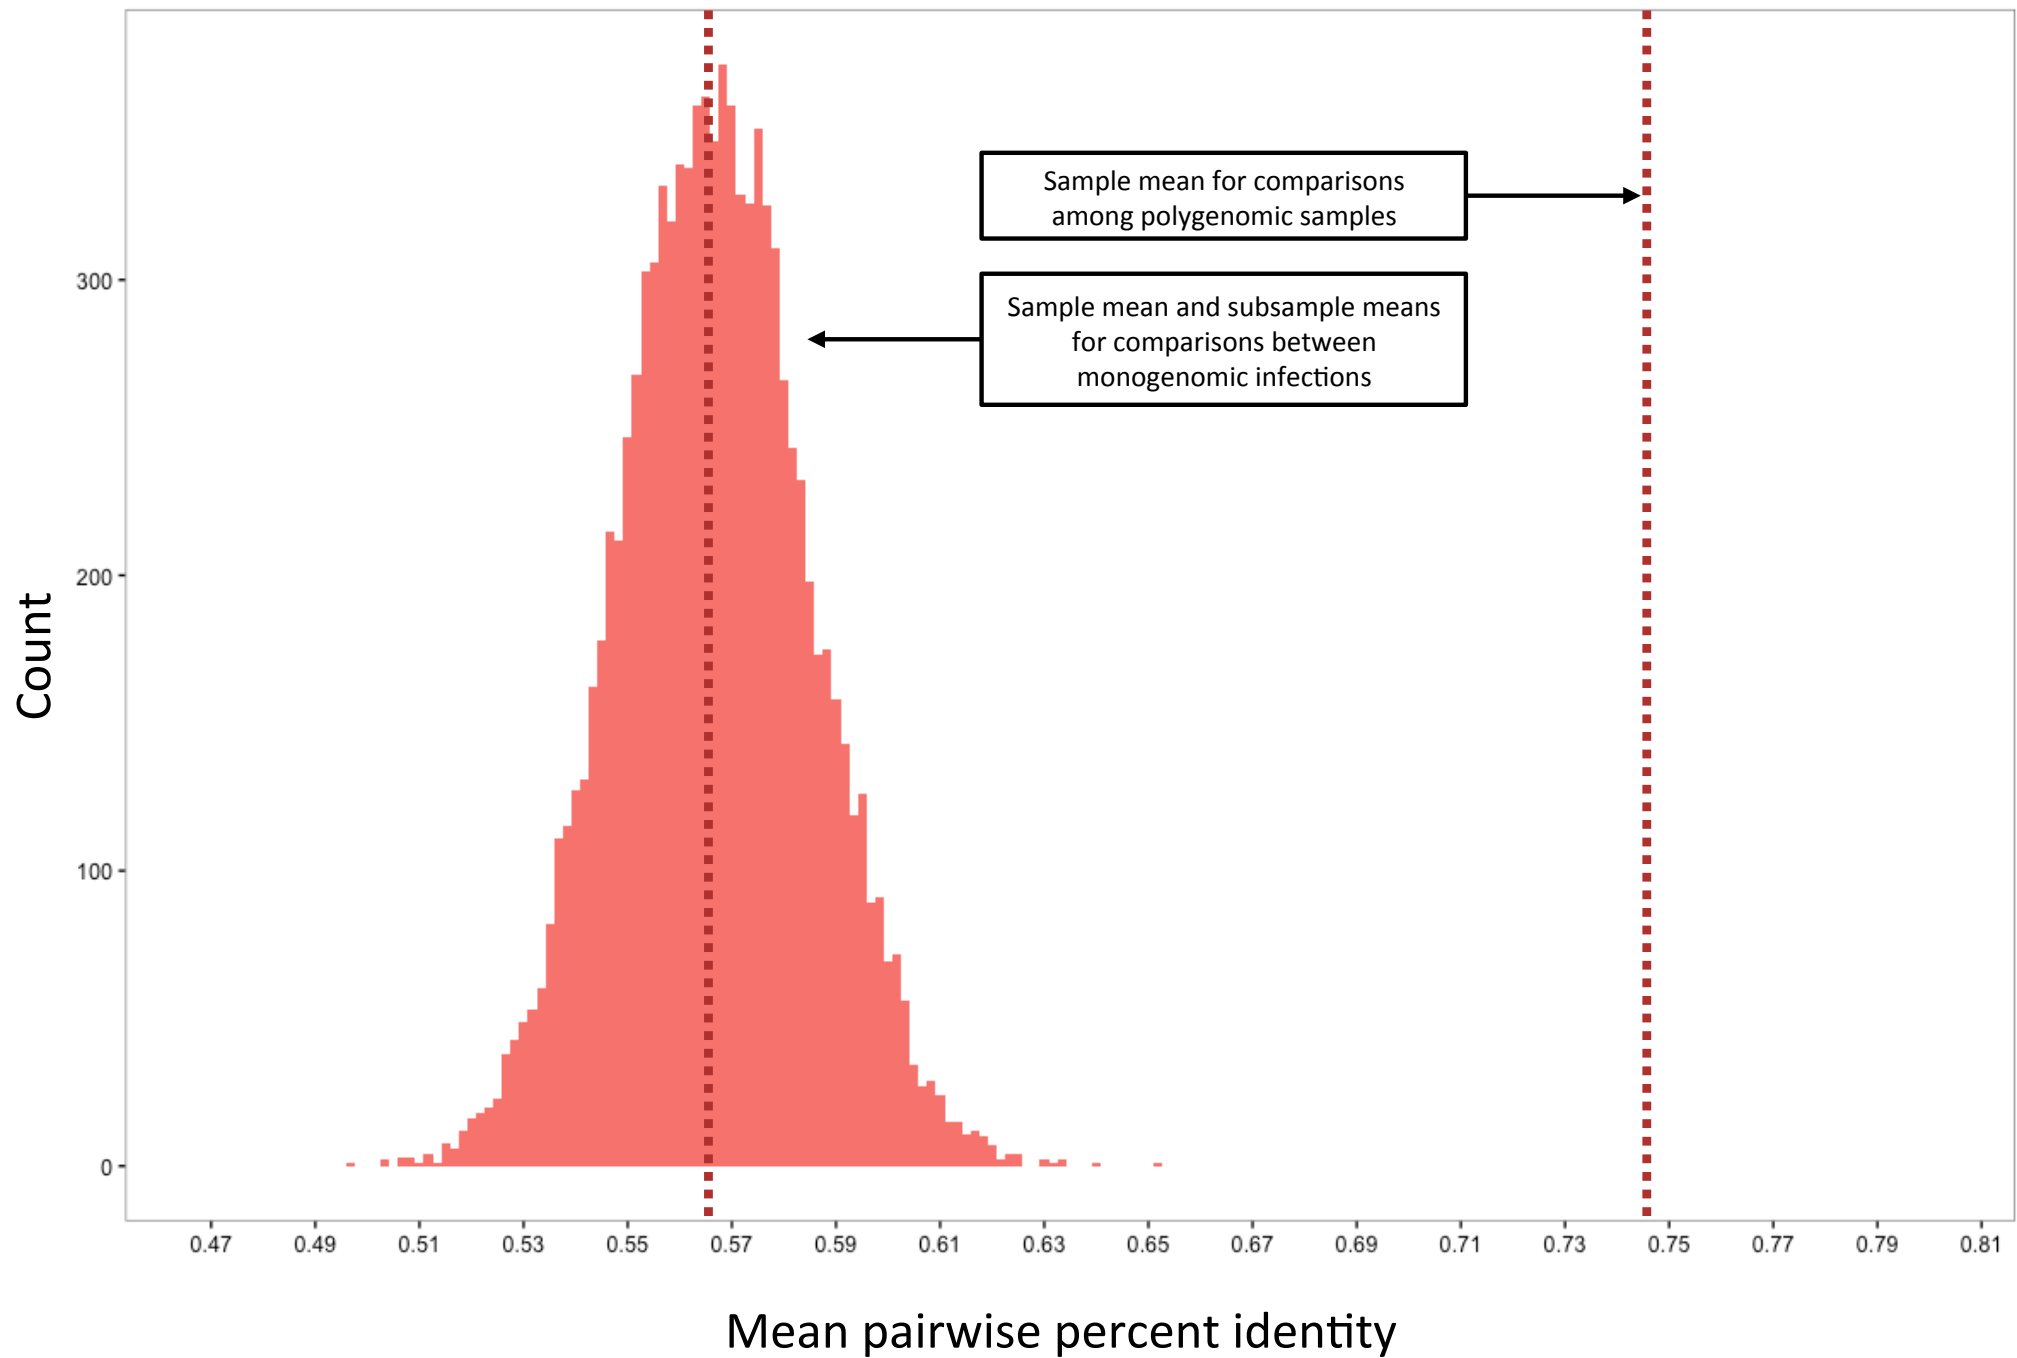

Supplement: MOESM3 [file 11945358]
