# Supplementary material for: Genetic evidence that the Makira region in northeastern Madagascar is a hotspot of malaria transmission
Source: Malar J. 2016 Dec 20;15:596. doi: 10.1186/s12936-016-1644-4 (PMC5175380; doi:10.1186/s12936-016-1644-4)
Supplement: Supplementary file 2 — Additional file 2. Contains the allele calls for the samples analyzed. [file 12936_2016_1644_MOESM2_ESM.xlsx]

## Sheet: Sheet1
Supplementary File 1: SNP allele calls and multilocus genotypes. Polygenomic positions, where multiple alleles were observed, are labeled as "P". Individual sample codes are in the format of community, household, individual and time point separated by periods.
	Loci and the chromosome (Chr) on which they are positioned:
	Chr01	Chr02	Chr05	Chr06	Chr07	Chr07	Chr07	Chr07	Chr09	Chr10	Chr11	Chr13	Chr01	Chr04	Chr06	Chr07	Chr07	Chr07	Chr07	Chr08	Chr10	Chr11	Chr13	Chr14
Sample	A1	A2	A3	A4	A5	A6	A7	A8	A9	A10	A11	A12	B1	B2	B3	B4	B5	B6	B7	B8	B9	B10	B11	B12
1.3.01.1	T	C		A			C	C	C		C			T	G	P	T	P	P		P	G	T	G
1.3.01.2	T	T			P		P	P	P			T		P	P		P	P	A	P	P	P		G
1.3.01.3	T	C	P	P	A	C	C	C		A		T		T	C	G	P	G	P			P	P	G
1.3.02.1				A	P		T	C			A	T		P	G	G		G	A				T	G
1.4.03.2	T	T	G	A	P		C		P			T		P	G	G	T	P	A	A	A	P	T	G
1.6.02.2	T		G		A			A				T		T	G	G	T	G		A				G
1.8.03.1	C		C	A	A	P	C	C	T		C	T		C	G	P	C	A	C	C	A	G	T	G
1.8.03.2	T	C		G		P	C	A		A		T		T		G	C		A			P		G
1.9.01.2	P	P	P	A	P		P	P	P	C	C	T		P	C	G	T	A	A	P	P	P	C	G
1.9.01.3	T		G	P	T		P	P	P		P	T		T	G	G	T	G	P	C	A	G	T	G
1.12.05.2	T	P	C		P			P				T		P	G	A	P	G				G	T	G
1.17.01.2		T		G	A	T	C	A	C			T		P	C	G	T	P		A				P
1.22.01.1	T						T	A				T		C	C			A	C		A	G	C	G
1.23.07.1	T						C	A	T			T		C			C	A	C	A		P	C	P
1.23.08.1					T		C	A	T			T	P		C	G	C	A		A		G	P	G
1.23.08.2				A	A		C	A	P			T		T	G	G	T	G	A	A	A	G	T
1.24.01.3	T	C	C	A	A	T	C	C	T		C	T			G	A	C	A	C	C	A	G	T	G
1.24.05.2	T	T	G		A			A				T		P	P	G	T	G	A	P	A	G	T	G
1.26.03.3	C	T	G	A			C	P	C	C	C	T		T						C	A			G
1.30.06.3	P	P	C		P	P	P	C	P	A		T		T	P	P	P	P	P			G	T	G
1.31.02.1	T	C	C	P			C	C	T		C	T		C	P	A	C	A	A	A	A	G	T	G
1.35.01.1	T				T		C		T			T	A		C	G	C	A	C	A		G	C	G
1.36.06.3	C	P	C	A	T	C	C	A	T	A	A	T		T	P		C	A						G
1.36.07.2	P		C		P		P	C				T		T	P	P					A	P	P	P
1.37.06.1	C				A		C	A				G		T	C		T	A	C	C	A	G	C	G
1.38.01.1					T		C	A	T			T					C	A	C	A	A	P	C	G
1.38.02.3	C	C	C	A			T	A	T	A		T			G	A				C		G		G
1.43.06.1	C				T		C	P	P			G				G	C	P	A	A	A	G	T	G
1.44.03.3	C	C	C	A	A		C	A			A	T			C	G		G	C	C	A		C
1.46.02.3	T		C	A	T	P	C				C			T	G	G	T	A	C
1.47.05.1	C				T		P	A	T			T					C	A		A		G	C	G
1.47.06.1	T		G	A			T	C	T		C	T		C	G	G	T	A				A	T	G
1.48.04.1	T						C	A	T			T			C		P			P	A	G	C	G
1.49.01.1	T	C	G		A	T		C	P	A	C			P	G	P	T	A	A	P		G		G
1.50.03.1	C		P	A	T			A		C		T		P	G	G	T		A	C		A	T
1.51.05.2	C	T	C	A	A			A	C	A	C	G	A	T	C	G	C	P	A	C	A	G	C	G
1.52.02.2	P		C	A	T		C	A	P	A	A	T		T	G	G	T	A	A	C	A	G	T	G
1.57.05.1	T				P		C	A				P		P	C		P	G	A	P	A	P	P	G
1.64.01.2	T	P		A	P			A	T			T		T	G	G	P	A		P		G	C
1.64.04.1						P	T	C	P	A	A				C	A	C		P	C		P	T	G
1.64.05.1	T				T		P	P	T			T			P		C	P	C	P		G	C	G
1.66.01.1	P				T		C	A	P			T		T	C		C		P	A	A	P	C	P
1.68.02.1	T				A		T	A	T			G		T	G	G	C	A	A	C	A	A	C	G
1.68.02.2	T	T	C	A	A			A	T		C	G	A	T	G	G	C	A	A	C	A	A	C	G
1.70.05.1	C				P			C	P			T		T			C	P	C		A	P	C	P
1.71.02.1	T				T		P	A	C						C		C	P	C	A	A	G		G
1.73.03.2	T				T		T	C				G		C	G	A	T	A	C	A	P	A	C	T
1.79.07.2					T		C		C			T	A	C	C		C	A	P	A		G	C	G
1.81.02.3	C		C		A			C	T				A	T	P	G		G	C			G
1.83.05.2	T				T		P	A	T			T		C		G	C	P	C	A	A	G	C	G
1.89.04.2	T				T		C					T	P	T		G	C	A		A	A	G	P	G
1.90.01.3	T	C		A	T			A	T		C		A	T	C	G	C	A	C	C	A	G	T	G
1.90.03.2	T				A		C	A				P		T	C	G	P	G	C	C	A	G	C	G
1.90.03.3	P	T		A	T	P			C		C			C	C	G	P	P	C			G		G
1.90.04.2	T				T		T	A	T			P	A	C	P	A	P	A	C	A	A	A	C	T
1.91.02.2	T						C	A	T			T	G	C	C	G		A	C	A	A		C	G
1.91.05.2			C	P	T	C		P	P		A	T		T	G	G	T	A				G	T	G
1.92.01.2	T				T		C		T			T	G	C	C	G	C	A	P	A	A	G	P	G
1.93.01.2	T	C			A			P				T		T	C	G		G			T	G	T	T
1.93.02.2	T	C	G	A			T	C	T	C					C	A	C	A			T	G	T	G
2.6.02.3	C	C			A		C		P				P		G	P	T	A		C		G	T	G
2.7.02.2					T		P	C	T			T		P	P		C	P	C	P	A	G	T	P
2.8.01.1	C			P		C	T	C	T	A				C	P	A		G	A			G	T	G
2.12.05.1	C	T	C		A	T	T	P			A	T		T	G	G	T			C		G		P
2.13.04.2	T				T			A	T			T	G	T	C		C	A			A		C
2.23.01.2					A		C	A				G		C	C		C		C	A	A	G	T	G
2.25.05.2					T		P	A	T					P	C		C	A	C	A	A	G	C	G
2.27.05.2	T				T			A	P			T		C			C	A	C	A	P		C	P
2.31.01.3	T			A	P		C	C	T		C		A	T	C	G	P	A		C	P	G	T	G
2.32.04.3	T	P	C	P	P			A	C		P		A	T	P	G	T	G		P	P	P	C	G
2.32.05.3		T		G	A			A	C		A		A	T	G	G	T	G	C	C	P	A	C	G
2.32.07.3	T			A	T			A	C		A			P	G	G	T	G	C			P	T	G
2.32.08.2	P				T		P	A	T			P		C			C	A			A	P		G
2.33.03.2	P				T		P	A	T			T	G	C	C	G	C	A	C		A	G	C	P
2.33.03.3	P		C	A	A	T	C	P	C		P		A	T	C	P	T	P	P	A	P	P		G
2.33.04.2	T				T		C	A	T			T		P	C	G	C	A	C	A	A	G	C	G
2.33.08.2	T				T		C	A	P			T		P	C		C	A	C	A	A	G	C	P
2.36.06.1	C		G	A	A			A	T		C	G		T	G	G	C	G	A	C	A	G	C	G
2.36.06.2	C	T			A	C		C	P					T		G	C	P	A	C	A	A	C	G
2.37.05.1	C	C	C	A	T			A	C		A	G		C	G	G	T	G	C	C	T	G	T	G
2.38.07.1	P	P	C	A	A			A	C		C	G	A	C	P	G	T	G	A	P	P	G	T	G
2.41.01.2					T			A	P			T	G	T		G	P	A	C		A	P	P	P
2.42.06.2					T			P	T			P	G				C	A	C	A	P	G	C	P
2.43.04.1								A	T	A	A			C	G	G	C		A		T	G		G
2.46.03.2	T		G		P			A				T		T	G	G	T	A	C	C		P	T	G
2.48.01.3	T		C	A	T		C		P				A		C	G	T	P				G	C	G
2.49.01.2					T			P	C			G	G	P	C	G	P	A	C	C	P	G	C	P
2.49.02.3	C		C	G			C	A	C				A	P	P			A			P	G	T	T
2.50.01.2					T			P	P			P		C	C	P	C	P		P	P	P	C	G
2.50.01.3	C	T	P	A	T				C		P		A			A	T		C			G		T
2.56.01.2					T			A	T			T		C		P	P	P		A	P	G	C	P
2.56.05.2		C			T			A				G		C		P	C	P		P	T	G	C	T
2.56.06.2					T			P	C			G		C	C	G		P	C	A	A	G	T	P
2.57.04.3	P	C					C	P	C		C		P	C	G	G		P	P	C		G	T	G
